# Supplementary material for: Profiling Anticancer and Antioxidant Activities of Phenolic Compounds Present in Black Walnuts (Juglans nigra) Using a High-Throughput Screening Approach
Source: MDPI journal article supplement (doi:10.3390/molecules25194516), 2020-10-02
Supplement: s1 [file s1]

# Profiling Anticancer and Antioxidant Activities of Phenolic Compounds in Black Walnuts (*Juglans nigra*) using a High-Throughput Screening Approach

Khanh-Van Ho<sup>1,2</sup>, Anuradha Roy<sup>3</sup>, Sarah Foote<sup>4</sup>, Phuc H. Vo<sup>1</sup>, Namrita Lall<sup>1,5</sup> and Chung-Ho Lin<sup>1\*</sup>

<sup>1</sup> Center for Agroforestry, School of Natural Resources, University of Missouri, Columbia, Missouri, United States

<sup>2</sup> Department of Food Technology, Can Tho University, Can Tho, Vietnam

<sup>3</sup> High Throughput Screening Laboratory, University of Kansas, Lawrence, Kansas, United States

<sup>4</sup> CEVA Biomune, Lenexa, Kansas, United States

<sup>5</sup> Department of Plants and Soil Sciences, Plant Science Complex, University of Pretoria, Pretoria, South Africa

\* Correspondence: Chung-Ho Lin: LinChu@missouri.edu

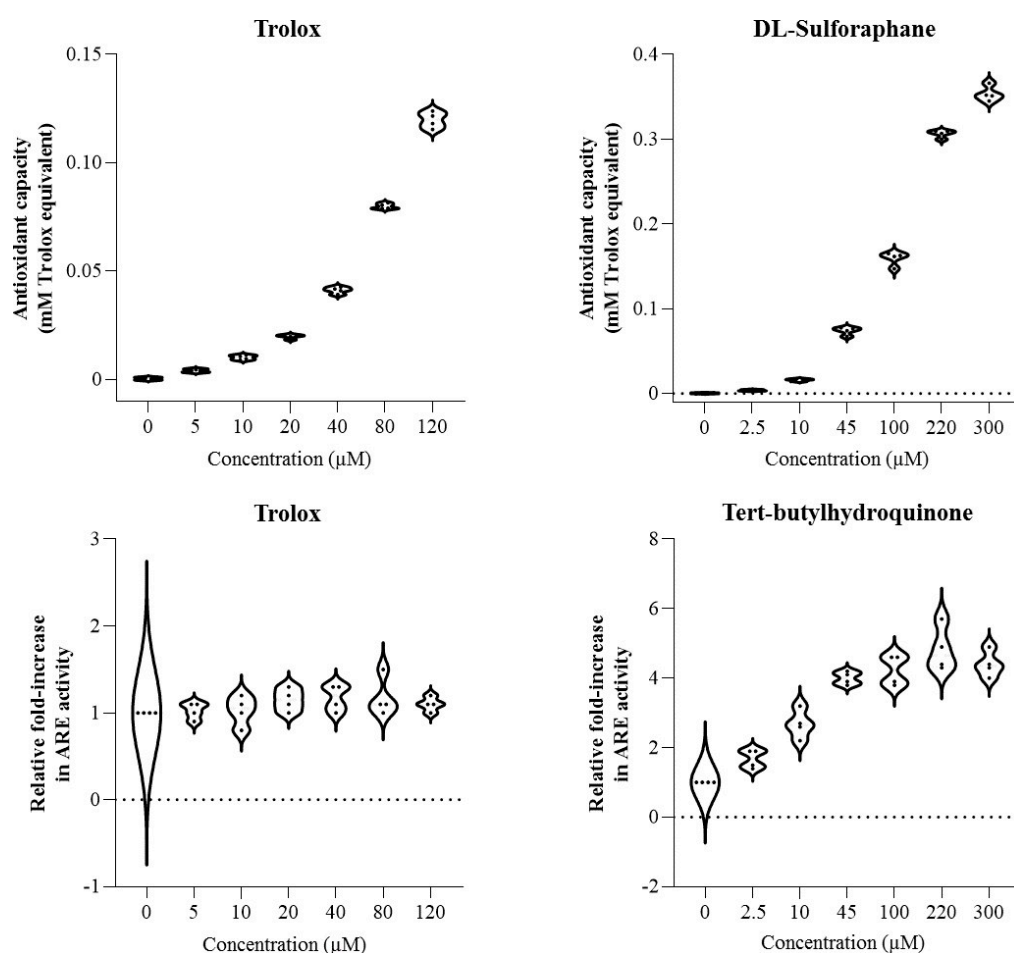

**Supplementary Figure 1.** Data distribution (n=4) of controls (Trolox, DL-sulforaphane, tert-butylhydroquinone) in total antioxidant capacity and antioxidant response element (ARE) activation assays. Each violin plot represents the distribution of data for each treatment/concentration. Dot symbols inside violin plots represents data points of each replicate.

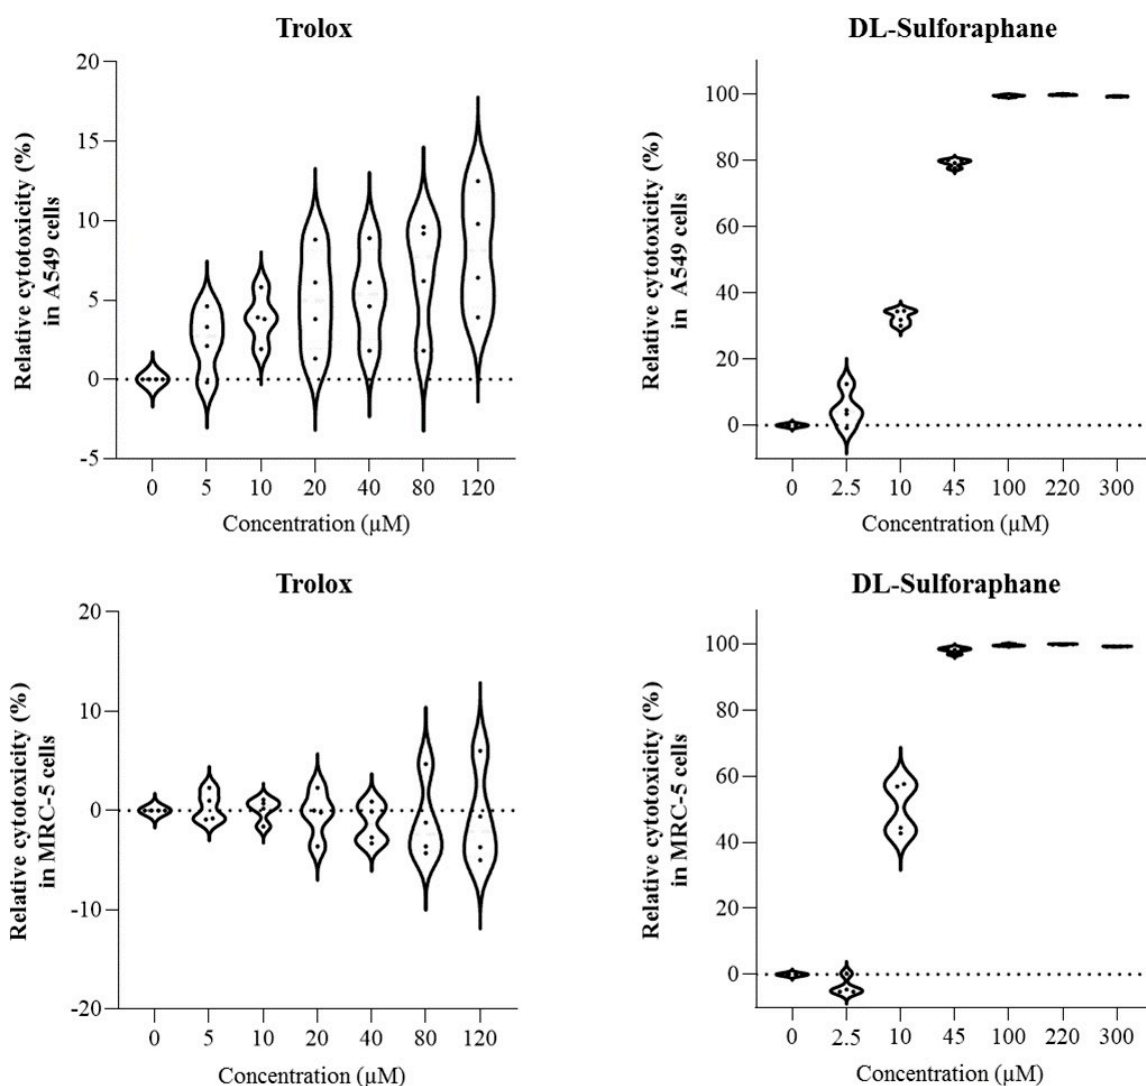

**Supplementary Figure 2.** Data distribution (n=4) of controls (Trolox, DL-sulforaphane) in cytotoxicity assays. Each violin plot represents the distribution of data for each treatment/concentration. Dot symbols inside violin plots represents data points of each replicate.
